# Supplementary material for: Repression of germline genes by PRC1.6 and SETDB1 in the early embryo precedes DNA methylation-mediated silencing
Source: Research Square preprint supplement (doi:10.21203/rs.3.rs-400263/v1), 2021-04-14
Supplement: Supplementary file 1 [file 0c8f6b71e2f33fda67aedb43.xlsx]

## Sheet: ChIP-seq
Supplementary Data 6. Summary of ChIP-seq.
Sample	Mark	Read count	Library layout
E9.5_PGC	H3K9me3	31192883	75 paired-end
Mga_WT_nESC	H3K9me3	18681880	76 paired-end
	H2AK119ub1	25381680	76 paired-end
	input	14168419	76 paired-end
Mga_WT_EpiLC	H3K9me3	18847448	76 paired-end
	H2AK119ub1	28690617	76 paired-end
	input	15467944	76 paired-end
Mga_WT_d4PGCLC	H3K9me3	24758205	76 paired-end
	H2AK119ub1	28212045	76 paired-end
	input	15993583	76 paired-end
Mga_dHLH_nESC	H3K9me3	20520808	76 paired-end
	H2AK119ub1	26934334	76 paired-end
	input	16021590	76 paired-end
Mga_dHLH_EpiLC	H3K9me3	22661028	76 paired-end
	H2AK119ub1	23386862	76 paired-end
	input	17419780	76 paired-end
Setdb1_WT_nESC	H3K9me3	20508003	76 paired-end
	H2AK119ub1	30642656	76 paired-end
	input	14952701	76 paired-end
Setdb1_WT_EpiLC	H3K9me3	26144967	76 paired-end
	H2AK119ub1	24380501	76 paired-end
	input
Setdb1_cKO_nESC	H3K9me3	20395579	76 paired-end
	H2AK119ub1	25296226	76 paired-end
	input	23149750	76 paired-end
Setdb1_cKO_EpiLC	H3K9me3	29076602	76 paired-end
	H2AK119ub1	27745615	76 paired-end
	input
Pcgf6_WT_nESC	H3K9me3	22621919	76 paired-end
	H2AK119ub1	27158870	76 paired-end
	input	17974763	76 paired-end
Pcgf6_WT_EpiLC	H3K9me3	19665937	76 paired-end
	H2AK119ub1	22046419	76 paired-end
	input	8301355	76 paired-end
Pcgf6_cKO_nESC	H3K9me3	20916955	76 paired-end
	H2AK119ub1	24506570	76 paired-end
	input	15557462	76 paired-end
Pcgf6_cKO_EpiLC	H3K9me3	16609242	76 paired-end
	H2AK119ub1	28996051	76 paired-end
	input	13207891	76 paired-end

## Sheet: RNA-seq
Summary of RNA-seq.
Sample	Total reads	Library layout
Dnmt_WT_nESC1	20917305	76 paired-end
Dnmt_WT_nESC2	25980665	76 paired-end
Dnmt_WT_EpiLC1	35409077	76 paired-end
Dnmt_WT_EpiLC2	24425572	76 paired-end
Dnmt_cTKO_nESC1	23024314	76 paired-end
Dnmt_cTKO_nESC2	21040439	76 paired-end
Dnmt_cTKO_EpiLC1	35688014	76 paired-end
Dnmt_cTKO_EpiLC2	26961710	76 paired-end
Mga_WT_nESC1	29643542	76 paired-end
Mga_WT_nESC2	17806158	76 paired-end
Mga_WT_EpiLC1	17723728	76 paired-end
Mga_WT_EpiLC2	22257772	76 paired-end
Mga_dHLH_nESC1	35455383	76 paired-end
Mga_dHLH_nESC2	23774065	76 paired-end
Mga_dHLH_EpiLC1	33651699	76 paired-end
Mga_dHLH_EpiLC2	26752804	76 paired-end
Setdb1_WT_nESC1	4184376	76 paired-end
Setdb1_WT_nESC2	23697837	76 paired-end
Setdb1_WT_EpiLC1	30514903	76 paired-end
Setdb1_WT_EpiLC2	28255242	76 paired-end
Setdb1_cKO_nESC1	17502007	76 paired-end
Setdb1_cKO_nESC2	23842712	76 paired-end
Setdb1_cKO_EpiLC1	27059560	76 paired-end
Setdb1_cKO_EpiLC2	23673426	76 paired-end
Pcgf6_WT_nESC1	11271493	76 paired-end
Pcgf6_WT_nESC2	28542792	76 paired-end
Pcgf6_WT_EpiLC1	17984455	76 paired-end
Pcgf6_WT_EpiLC2	26410220	76 paired-end
Pcgf6_cKO_nESC1	23656688	76 paired-end
Pcgf6_cKO_nESC2	22605276	76 paired-end
Pcgf6_cKO_EpiLC1	38737264	76 paired-end
Pcgf6_cKO_EpiLC2	22880352	76 paired-end
Ring1b_WT_pESC	14963928	50 single-end
Ring1b_cKO_pESC	15770525	50 single-end
Ring1b_WT_nESC1	18363037	76 paired-end
Ring1b_WT_nESC2	24419579	76 paired-end
Ring1b_WT_EpiLC1	27955523	76 paired-end
Ring1b_WT_EpiLC2	29198497	76 paired-end
Ring1b_cKO_nESC1	20009627	76 paired-end
Ring1b_cKO_nESC2	22117362	76 paired-end
Ring1b_cKO_EpiLC1	34094036	76 paired-end
Ring1b_cKO_EpiLC2	24715086	76 paired-end
Setdb1Ring1b_WT_nESC1	35832383	76 paired-end
Setdb1Ring1b_WT_nESC2	21690485	76 paired-end
Setdb1Ring1b_WT_EpiLC1	48038346	76 paired-end
Setdb1Ring1b_WT_EpiLC2	32858497	76 paired-end
Setdb1Ring1b_cDKO_nESC1	42656886	76 paired-end
Setdb1Ring1b_cDKO_nESC2	21060801	76 paired-end
Setdb1Ring1b_cDKO_EpiLC1	34742428	76 paired-end
Setdb1Ring1b_cDKO_EpiLC2	26848246	76 paired-end
