# Supplementary material for: Repression of germline genes by PRC1.6 and SETDB1 in the early embryo precedes DNA methylation-mediated silencing
Source: Research Square preprint supplement (doi:10.21203/rs.3.rs-400263/v1), 2021-04-14
Supplement: Supplementary file 2 [file 7d812d6eefdc7c7f420bfd6e.pdf]

## **Description of Additional Supplementary Files**

### **Supplementary Data 1**

List of 137 DNA methylation sensitive (DMS) germline genes identified Dahlet et al. (2020).

### **Supplementary Data 2**

List of previously published datasets used in this study.

### **Supplementary Data 3**

List of 40 DMS germline genes bound by MGA (RPKM >2) & E2F6 (RPKM >1) and enriched for DNAm (% >30) in ESCs. Related to Figure 1B.

### **Supplementary Data 4**

Lists of germline genes significantly upregulated and top 5 GO terms among the terms associated with genes significantly upregulated in the indicated mutant cells.

### **Supplementary Data 5**

Oligonucleotide sequences used in this study.

### **Supplementary Data 6**

Summary of ChIP-seq and RNA-seq.
