# Supplementary material for: Repression of germline genes by PRC1.6 and SETDB1 in the early embryo precedes DNA methylation-mediated silencing
Source: Research Square preprint supplement (doi:10.21203/rs.3.rs-400263/v1), 2021-04-14
Supplement: Supplementary file 2 [file 62758ee971c261fbc7b9b564.xlsx]

## Sheet: Sheet1
Supplementary Data 5. Oligonucleotide sequences used in this study.
Name	Application	Sequence
Arbp_F	RT (internal control)	AGATTCGGGATATGCTGTTGGC
Arbp_R	RT (internal control)	TCGGGTCCTAGACCAGTGTTC
Dnmt1_ex5-6_F	RT	ACCATCACGGCTCACTTCA
Dnmt1_ex5-6_R	RT	CCCTCTTCCGACTCTTCCTT
Dnmt3a_ex18-19_F	RT	CCTGCAATGACCTCTCCATT
Dnmt3a_ex18-19_R	RT	AAAGAAGAGGCGGCCAGTA
Dnmt3b_ex18-19_F	RT	GCCCATGCAATGATCTCTCT
Dnmt3b_ex18-19_R	RT	CCAGAAGAATGGACGGTTGT
Ring1b_ex2-3_F	RT	TGTGCAGACAAATGGAACTCA
Ring1b_ex2-3_R	RT	TTCCAAGCCATCTGTTATTGC
Pcgf6_ex3-5_F	RT	CCACCAGACTCAGCCTCTTTAT
Pcgf6_ex3-5_R	RT	TGGGGACTTCTAGACCTCTTTCT
Setdb1_ex16-17_F	RT	TTGAGCTTCAAGGATGAAGGA
Setdb1_ex16-17_R	RT	GGCATCTTGTTTCGGTTCTC
Mael_promoter_F	Bisulphite	ATGTATAGGGAAAAAATAATAATAAAAGTATTAGGT
Mael_promoter_R	Bisulphite	TACCCTTAAACTATATCCCCTCCAC
Mov10l1_promoter_F	Bisulphite	GGAATATTGGAATAGAGGGATTATTTTA
Mov10l1_promoter_R	Bisulphite	CCCCACCTCACAAACCTACTAA
PE adaptor 1	RNA-seq/ChIP-seq	PGATCGGAAGAGCGGTTCAGCAGGAATGCCGAG	P = phosphorylated
PE adaptor 2	RNA-seq/ChIP-seq	ACACTCTTTCCTACACGACGCTCTTCCGATC*T	* = phosphorothioated
