# Supplementary material for: Repression of germline genes by PRC1.6 and SETDB1 in the early embryo precedes DNA methylation-mediated silencing
Source: Research Square preprint supplement (doi:10.21203/rs.3.rs-400263/v1), 2021-04-14
Supplement: Supplementary file 3 [file d2604cef7c8a60622007dc63.xlsx]

## Sheet: Data sets analyzed
Supplementary Data 2. List of previously published datasets used in this study.
Author(s)	Year	Category	Dataset	Accession number	Dataset URL	Used in Figure
Stielow	2018	ChIP-seq	MGA, PCGF6 in pESC	E-MTAB-6007	https://www.ebi.ac.uk/arrayexpress/experiments/E-MTAB-6007/	1, S1, 2, S3, S4
Cusack	2020	ChIP-seq	MAX in pESC	GSE131366	https://www.ncbi.nlm.nih.gov/geo/query/acc.cgi?acc=GSE131366	1, S1, S4
Tao	2020	ChIP-seq	E2F6 in nESC	GSE108620	https://www.ncbi.nlm.nih.gov/geo/query/acc.cgi?acc=GSE108620	1, S1, S3, S4
Elsasser	2015	ChIP-seq	KAP1 in pESC	GSE59188	https://www.ncbi.nlm.nih.gov/geo/query/acc.cgi?acc=GSE59188	1, S1, S2
Matsumura	2015	ChIP-seq	SETDB1 in pESC	GSE73432	https://www.ncbi.nlm.nih.gov/geo/query/acc.cgi?acc=GSE73432	1, S1
Wang	2018	ChIP-seq	H3K9me3 in pESC and embryo (E1.5/3.0/3.5/6.5), H3K27me3 in pESC and E6.5 epiblast	GSE98149	https://www.ncbi.nlm.nih.gov/geo/query/acc.cgi?acc=GSE98149	1, S1, 2, S2, 3, S3
Ostapcuk	2018	ChIP-seq	HP1β in pESC (*Culture medium contained 2i in addition to serum)	GSE97945	https://www.ncbi.nlm.nih.gov/geo/query/acc.cgi?acc=GSE97945	1, S1
Fursova	2020	ChIP-seq	RING1B in pESC	GSE132752	https://www.ncbi.nlm.nih.gov/geo/query/acc.cgi?acc=GSE132752	1, S1
Blackledge	2020	ChIP-seq	H2AK119ub1 in pESC	GSE119618	https://www.ncbi.nlm.nih.gov/geo/query/acc.cgi?acc=GSE119618	1, S1, 2, S2
Perino	2018	ChIP-seq	JARID2 in pESC	GSE94300	https://www.ncbi.nlm.nih.gov/geo/query/acc.cgi?acc=GSE94300	1
Zhang	2019	ChIP-seq	EED in pESC	E-MTAB-6165	https://www.ebi.ac.uk/arrayexpress/experiments/E-MTAB-6165/	1, S1
Liu	2016	ChIP-seq	H3K27me3 in embryo (E1.5/3.0/3.5)	GSE73952	https://www.ncbi.nlm.nih.gov/geo/query/acc.cgi?acc=GSE73952	3, S3
Sachs	2013	ChIP-seq	H3K27me3 in E11.5 PGC	GSE46396	https://www.ncbi.nlm.nih.gov/geo/query/acc.cgi?acc=GSE46396	3, S3
Yang	2019	ChIP-seq	H3K27me3 in nESC and EpiLC	GSE117896	https://www.ncbi.nlm.nih.gov/geo/query/acc.cgi?acc=GSE117896	3, S3
Kurimoto	2015	ChIP-seq	H3K27me3 in d6 PGCLC	GSE60204	https://www.ncbi.nlm.nih.gov/geo/query/acc.cgi?acc=GSE60204	3, S3
Xiong	2016	ChIP-seq	TET1 in pESC	GSE57700	https://www.ncbi.nlm.nih.gov/geo/query/acc.cgi?acc=GSE57700	S4
Khoueiry	2017	ChIP-seq	TET1 in EpiLC	E-MTAB-4581	https://www.ebi.ac.uk/arrayexpress/experiments/E-MTAB-4581/	S4
Chen	2021	CUT&RUN	H2AK119ub1 in embryo (E1.5/3.0/3.5/6.5)	GSE153529	https://www.ncbi.nlm.nih.gov/geo/query/acc.cgi?acc=GSE153529	3, S3
Endoh	2017	RNA-seq	pESC (Mga KD, Max KD, Pcgf6 cKO)	GSE84480	https://www.ncbi.nlm.nih.gov/geo/query/acc.cgi?acc=GSE84480	2, S2
Leung	2014	RNA-seq	pESC (Dnmt3 DKO)	GSE47883	https://www.ncbi.nlm.nih.gov/geo/query/acc.cgi?acc=GSE47883	2
Karimi	2011	RNA-seq	pESC (Setdb1 cKO)	GSE29413	https://www.ncbi.nlm.nih.gov/geo/query/acc.cgi?acc=GSE29413	2
Ostapcuk	2018	RNA-seq	pESC (HP1 cTKO)	GSE97945	https://www.ncbi.nlm.nih.gov/geo/query/acc.cgi?acc=GSE97945	2, S2
Rowe	2013	RNA-seq	pESC (Kap1 cKO)	GSE41903	https://www.ncbi.nlm.nih.gov/geo/query/acc.cgi?acc=GSE41903	S2
Tamburri	2019	RNA-seq	pESC (Eed cKO) (*Culture medium contained 2i in addition to serum)	GSE134053	https://www.ncbi.nlm.nih.gov/geo/query/acc.cgi?acc=GSE134053	S2
Wang	2018	RNA-seq	Embryo (E3.0/3.5/6.5)	GSE98150	https://www.ncbi.nlm.nih.gov/geo/query/acc.cgi?acc=GSE98150	3
Miyauchi	2017	RNA-seq	PGC (E9.5/13.5), PGCLC (d4/d4c7)	GSE94136	https://www.ncbi.nlm.nih.gov/geo/query/acc.cgi?acc=GSE94136	3
Shirane	2016	RNA-seq	EpiLC	DRA003471	https://ddbj.nig.ac.jp/DRASearch/submission?acc=DRA003471	3
Habibi	2013	WGBS	pESC and nESC	GSE41923	https://www.ncbi.nlm.nih.gov/geo/query/acc.cgi?acc=GSE41923	1, S1, 2, 3, S3, 4, S4
Wang	2018	WGBS	E3.0 morula and E8.5 embryo	GSE98151	https://www.ncbi.nlm.nih.gov/geo/query/acc.cgi?acc=GSE98151	S1, 3, S3
Smith	2017	WGBS	E3.5 ICM	GSE84235	https://www.ncbi.nlm.nih.gov/geo/query/acc.cgi?acc=GSE84235	3, S3
Seisenberger	2012	WGBS	E6.5 epiblast and E9.5 PGC	PRJEB3376	https://www.ebi.ac.uk/ena/browser/view/PRJEB3376	3, S3
Shirane	2016	WGBS	EpiLC and d4 PGCLC	DRA003471	https://ddbj.nig.ac.jp/DRASearch/submission?acc=DRA003471	3, S3, 4, S4
Grosswendt	2020	WGBS	E6.5 epiblast (Dnmt KOs, Ring1b KO, L3mbtl2 KO)	GSE137337	https://www.ncbi.nlm.nih.gov/geo/query/acc.cgi?acc=GSE137337	4, 5
Khoueiry	2017	5hmCIP-seq	nESC and EpiLC	E-MTAB-4581	https://www.ebi.ac.uk/arrayexpress/experiments/E-MTAB-4581/	S4
