# Supplementary material for: Repression of germline genes by PRC1.6 and SETDB1 in the early embryo precedes DNA methylation-mediated silencing
Source: Research Square preprint supplement (doi:10.21203/rs.3.rs-400263/v1), 2021-04-14
Supplement: Supplementary file 4 [file d417d3f61372ff27b6112a05.xlsx]

## Sheet: Upregulated genes
Supplementary Data 4. List of germline genes significantly upregulated in the indicated mutant cells.
	UPREGULATED GENES
Mutant:	Mga-dHLH		Setdb1 cKO		Pcgf6 cKO		Dnmt cTKO		Ring1b cKO		Setdb1/Ring1b cDKO
Cell type:	nESC	EpiLC	nESC	EpiLC	nESC	EpiLC	nESC	EpiLC	nESC	EpiLC	nESC	EpiLC
All genes (24421)	772	1270	25	56	121	190	755	1744	249	287	640	1198
DMS germline genes (137)	35	52	3	6	22	20	28	70	20	16	45	58
GGD genes (8)	6	7	2	1	8	6	3	5	6	6	8	8
	4930502E18Rik	4930502E18Rik	Dazl	Lncenc1	Adad2	AU022751	1700013H16Rik	1700013H16Rik	Ccdc36	Ccdc36	1700029P11Rik	1700029P11Rik
	Adad2	4930591A17Rik	Stag3	Prr19	Ccdc36	Adad1	4930550L24Rik	1700018B24Rik	Dazl	Ddx4	4930502E18Rik	AU022751
	Als2cr11	Adad1	Tex19.1	Rpl39l	Dazl	Brdt	Cox7b2	1700029P11Rik	Ddx4	Dnmt3l	AU022751	Adad2
	Ctcfl	Adad2		Stag3	Ddx4	Ccdc36	Dazl	4930502E18Rik	Dmrtb1	Mael	Adad2	Aurkc
	Dazl	Als2cr11		Tex19.1	Fkbp6	Ctcfl	Dnmt3l	4930550L24Rik	Fkbp6	Meioc	Brdt	Brdt
	Ddx4	Ccdc36		Tuba3a	Hist1h2aa	Ddx4	Fam178b	4933425L06Rik	Gpat2	Mov10l1	Ccdc36	Ccdc36
	Dnmt3l	Ctcfl			Hist1h2ba	Mael	Fkbp6	AU022751	Hist1h2aa	Piwil2	Ccnb1ip1	Cox7b2
	Fam178b	Cyct			Mael	Meioc	Gpat2	Abca16	Hist1h2ba	Pramel1	Ctcfl	Ctcfl
	Fkbp6	Dazl			Meioc	Mov10l1	Gtsf1	Adad2	Mael	Slc25a31	D1Pas1	D1Pas1
	Hist1h2ba	Ddx4			Mov10l1	Piwil2	Hormad1	Asz1	Meioc	Sohlh2	Dazl	Dazl
	Hormad1	Dnmt3l			Otud6a	Pramel1	Hsf2bp	Ccdc152	Mov10l1	Stk31	Ddx4	Ddx4
	Hsf2bp	Fkbp6			Piwil2	Slc25a31	Morc1	Ccdc172	Otud6a	Syce1	Dmrtb1	Dmrtb1
	Mael	Hist1h2aa			Pramel1	Sohlh2	Nlrp4c	Ccdc36	Piwil2	Sycp1	Dnmt3l	Dnmt3l
	Mov10l1	Hormad1			Rnf17	Stk31	Nxf3	Ccnb1ip1	Pramel1	Sycp2	Fkbp6	Dpep3
	Naa11	Lncenc1			Slc25a31	Syce1	Pet2	Cox7b2	Sec1	Taf7l	Gpat2	Fkbp6
	Piwil2	M1ap			Sohlh2	Sycp1	Piwil2	Ctcfl	Sohlh2	Tex11	Hist1h2aa	Gpat2
	Pramef12	Meioc			Stk31	Sycp2	Rbmxl2	Dazl	Stk31		Hist1h2ba	Hist1h2aa
	Prr19	Mael			Syce1	Sycp3	Rpl10l	Dmrtb1	Syce1		Hormad1	Hist1h2ba
	Prr23a3	Morc1			Sycp1	Taf7l	Rpl39l	Dnmt3l	Tex11		Mael	Hormad1
	Prss42	Mov10l1			Taf7l	Tex11	Stk31	Dpep3	Tex19.1		Mov10l1	Lncenc1
	Rnf17	Naa11			Tex11		Syce1	Fam178b			Naa11	M1ap
	Sec1	Nxf2			Tex19.1		Tex13	Fkbp6			Otud6a	Mael
	Sohlh2	Nxf3					Tex19.1	Gm41			Piwil2	Meioc
	Stag3	Piwil2					Tex19.2	Gpat2			Pramef12	Morc1
	Stk31	Pramef12					Tktl2	Gtsf1			Pramel1	Mov10l1
	Stra8	Pramel1					Tuba3a	Hist1h2aa			Rbm44	Naa11
	Syce1	Prr19					Usp26	Hist1h2ba			Rnf17	Nlrp4c
	Sycp1	Rnf17					Zim3	Hormad1			Rpl10l	Otud6a
	Sycp2	Rpl10l						Hormad2			Rpl39l	Piwil2
	Sycp3	Sec1						Hsf2bp			Sec1	Pramel1
	Taf7l	Slc25a31						Igbp1b			Slc25a31	Prr19
	Tex11	Smc1b						Lncenc1			Sohlh2	Prr23a3
	Timm8a2	Sohlh1						M1ap			Stag3	Rbm44
	Tuba3a	Sohlh2						Morc1			Stk31	Rbmxl2
	Zp3	Stag3						Naa11			Syce1	Rnf17
		Stk31						Nlrp14			Sycp1	Rpl10l
		Stra8						Nlrp4c			Sycp2	Sec1
		Syce1						Nlrp5			Sycp3	Slc25a31
		Syce3						Nxf2			Taf7l	Smc1b
		Sycp1						Nxf3			Tex101	Sohlh2
		Sycp2						Otud6a			Tex11	Spz1
		Sycp3						Pabpc6			Tex19.1	Stag3
		Taf7l						Pdha2			Tex19.2	Stk31
		Tex101						Pet2			Tuba3a	Syce1
		Tex11						Piwil2			Usp26	Syce3
		Tex13						Pramel3				Sycp1
		Tktl1						Prr19				Sycp2
		Topaz1						Rpl10l				Sycp3
		Tuba3a						Rpl39l				Taf7l
		Tuba3b						Slc25a31				Terb2
		Usp26						Slc9b1				Tex101
		Zp3						Sohlh2				Tex11
								Stag3				Tex19.1
								Stk31				Tex19.2
								Syce1				Topaz1
								Sycp1				Tuba3a
								Taf7l				Usp26
								Tex101				Wbp2nl
								Tex11
								Tex13
								Tex19.1
								Tex19.2
								Tktl1
								Tktl2
								Topaz1
								Trim52
								Tuba3a
								Tuba3b
								Wfdc15a
								Zp3

## Sheet: GO terms Table
List of top 5 GO terms among the terms associated with genes significantly upregulated in the indicated mutant cells.
GO terms highlighted in green colored are germline-related ones.
Mutant			Mga-dHLH		Setdb1 cKO		Pcgf6 cKO		Dnmt cTKO		Ring1b cKO		Setdb1/Ring1b cDKO
Cell type			nESC	EpiLC	nESC	EpiLC	nESC	EpiLC	nESC	EpiLC	nESC	EpiLC	nESC	EpiLC
Top 5 GO terms		1	Organelle organization	Meiosis I	Meiotic nuclear division	Positive regulation of response to stimulus	Meiotic nuclear division	Meiosis I	Anatomical structure morphogenesis	Anatomical structure morphogenesis	Cell differentiation	Regulation of nucleic acid-templated transcription	Meiosis I	Regulation of RNA metabolic process
		2	Meiotic nuclear division	Meiosis I cell cycle process	Meiotic cell cycle process	Regulation of response to stimulus	Meiosis I	Meiosis I cell cycle process	System development	System development	Cellular developmental process	Regulation of transcription, DNA-templated	Meiosis I cell cycle process	Regulation of RNA biosynthetic process
		3	Meiosis I	Organelle organization	Synapsis	Synapsis	Meiosis I cell cycle process	Meiotic nuclear division	Negative regulation of cellular process	Cellular developmental process	System development	Regulation of RNA biosynthetic process	Regulation of transcription, DNA-templated	Regulation of gene expression
		4	Negative regulation of cellular process	Regulation of cellular component organization	Meiosis II	Male meiotic nuclear division	Meiotic cell cycle process	Meiotic cell cycle process	Tissue development	Cell differentiation	Circulatory system development	Regulation of gene expression	Regulation of gene expression	Regulation of nucleobase-containing compound metabolic process
		5	Meiosis I cell cycle process	Meiotic nuclear division	Male meiotic nuclear division	Regulation of signal transduction	Synapsis	Cell differentiation	Neurogenesis	Negative regulation of cellular process	Anatomical structure morphogenesis	Regulation of RNA metabolic process	Negative regulation of cellular process	Regulation of nucleic acid-templated transcription
Upregulated	genes (24421)		772	1270	25	56	121	190	755	1744	249	287	640	1198
	DMS germline genes (137)		35	52	3	6	22	20	28	70	20	16	45	58
	GGD genes (8)		6	7	2	1	8	6	3	5	6	6	8	8
