# Supplementary material for: Repression of germline genes by PRC1.6 and SETDB1 in the early embryo precedes DNA methylation-mediated silencing
Source: Research Square preprint supplement (doi:10.21203/rs.3.rs-400263/v1), 2021-04-14
Supplement: Supplementary file 5 [file e3eeca69b432c44559bfe4ef.xlsx]

## Sheet: DMS germline (137)
Supplementary Data 1. List of 137 DNA methylation sensitive (DMS) germline genes identified Dahlet et al. (2020).
GGD genes mentioned in Hackett et al. (2012) are shown in red.
	TSS +/-3 kb
Gene	E-box (CACGTG)	E2F (TCCCGC or GCGGGA)
1700013H16Rik	No	Yes
1700018B24Rik	Yes	Yes
1700020N01Rik	No	Yes
1700029P11Rik	Yes	Yes
1700047E10Rik	No	No
1700080O16Rik	No	Yes
4930502E18Rik	Yes	No
4930550L24Rik	No	No
4930591A17Rik	Yes	Yes
4933415F23Rik	No	Yes
4933416C03Rik	Yes	Yes
4933425L06Rik	No	Yes
4933427D06Rik	No	Yes
Abca16	No	No
Adad1	No	No
Adad2	Yes	Yes
Als2cr11	Yes	Yes
Asz1	Yes	No
AU022751	Yes	Yes
Aurkc	No	Yes
Brdt	Yes	No
Btbd18	No	No
Ccdc152	No	No
Ccdc172	Yes	Yes
Ccdc36	Yes	No
Ccdc73	No	No
Ccer1	Yes	No
Ccnb1ip1	Yes	Yes
Cetn1	Yes	Yes
Cox7b2	No	Yes
Cox8c	Yes	No
Ctcfl	Yes	Yes
Cyct	No	Yes
Cypt3	Yes	No
D1Pas1	Yes	Yes
Dazl	Yes	Yes
Ddx4	Yes	Yes
Dmrtb1	Yes	Yes
Dnmt3l	Yes	Yes
Dpep3	No	Yes
Fabp9	Yes	Yes
Fam178b	Yes	No
Fkbp6	Yes	Yes
Gm41	No	Yes
Gm6880	Yes	Yes
Gpat2	Yes	Yes
Gtsf1	No	No
Hdgfl1	No	Yes
Henmt1	Yes	No
Hist1h2aa	Yes	Yes
Hist1h2ba	Yes	Yes
Hormad1	Yes	Yes
Hormad2	No	No
Hsf2bp	Yes	Yes
Igbp1b	No	Yes
Kdm4d	No	No
Lncenc1	No	Yes
Ly6k	No	Yes
M1ap	No	Yes
Mael	Yes	Yes
Majin	No	Yes
Mei4	No	Yes
Meioc	Yes	Yes
Morc1	Yes	Yes
Mov10l1	Yes	Yes
Naa11	No	Yes
Nlrp14	No	Yes
Nlrp4c	Yes	No
Nlrp5	Yes	Yes
Nr5a1	Yes	Yes
Nxf2	Yes	Yes
Nxf3	Yes	Yes
Otud6a	No	Yes
Pabpc6	No	Yes
Pdcl2	No	No
Pdha2	No	No
Pet2	Yes	No
Piwil2	Yes	Yes
Pnldc1	Yes	No
Prame	No	Yes
Pramef12	Yes	No
Pramel1	No	Yes
Pramel3	No	No
Prr19	No	Yes
Prr23a2	Yes	Yes
Prr23a3	No	Yes
Prss38	Yes	Yes
Prss42	Yes	Yes
Psma8	Yes	No
Ptpn20	No	Yes
Rbm44	Yes	Yes
Rbmxl2	Yes	Yes
Rec114	Yes	Yes
Rnf17	Yes	No
Rpl10l	Yes	Yes
Rpl39l	No	Yes
Sec1	Yes	Yes
Slc25a31	Yes	Yes
Slc9b1	Yes	No
Smc1b	Yes	Yes
Sohlh1	Yes	Yes
Sohlh2	No	Yes
Spaca1	No	Yes
Spesp1	Yes	No
Spz1	Yes	Yes
Stag3	Yes	Yes
Stk31	Yes	No
Stra8	No	Yes
Syce1	No	Yes
Syce3	No	No
Sycp1	Yes	Yes
Sycp2	Yes	No
Sycp3	Yes	Yes
Taf7l	Yes	Yes
Tecr	No	No
Terb2	Yes	Yes
Tex101	No	Yes
Tex11	Yes	Yes
Tex12	Yes	Yes
Tex13	Yes	Yes
Tex19.1	Yes	Yes
Tex19.2	No	No
Timm8a2	No	No
Tktl1	Yes	Yes
Tktl2	Yes	Yes
Tnp1	No	Yes
Topaz1	Yes	No
Trim52	No	No
Tsga8	Yes	No
Tuba3a	Yes	Yes
Tuba3b	Yes	Yes
Usp26	No	Yes
Wbp2nl	Yes	Yes
Wdr20rt	Yes	Yes
Wfdc15a	No	No
Zim3	No	Yes
Zp3	Yes	Yes

## Sheet: GGD genes (8)
8 GGD genes (Hackett et al.)
Dazl
Ddx4
Mael
Mov10l1
Piwil2
Slc25a31
Taf7l
Tex19.1
