# Supplementary material for: Repression of germline genes by PRC1.6 and SETDB1 in the early embryo precedes DNA methylation-mediated silencing
Source: Research Square preprint supplement (doi:10.21203/rs.3.rs-400263/v1), 2021-04-14
Supplement: Supplementary file 6 [file ed701582ba63bc7df1f0b614.xlsx]

## Sheet: MGA_E2F6_DNAme-enriched (40)
Supplementary Data 3. List of 40 DMS germline genes bound by MGA (RPKM >2) & E2F6 (RPKM >1) and enriched for DNAme (% >30) in ESCs. Related to Figure 1B.
Genes associated with genome-defense/piRNA biogenesis (16 total)*		Genes associated with meiosis (18 total)		Other genes (6 total)
Adad1		4933416C03Rik		Fam178b
Adad2		D1Pas1		Pramel1
Btbd18		Dmrtb1		Prr23a2
Dazl		Hist1h2aa		Sec1
Ddx4		Hist1h2ba		Spaca1
Gpat2		Hormad1		Wbp2nl
Henmt1		Hormad2
Mael		Hsf2bp
Mov10l1		Majin
Piwil2		Prr19
Rnf17		Rbm44
Slc25a31		Syce1
Stk31		Sycp1
Taf7l		Sycp2
Tex19.1		Sycp3
Trim52		Terb2
		Tex12
		Tuba3a
* 8 germline genome defense (GGD) genes are shown in red.
